# Supplementary material for: New sterically encumbered arylimido hexamolybdates for organic oxidation reactions
Source: Royal Society of Chemistry journal article supplement (doi:10.1039/c5nj02330k), 2015-12-16
Supplement: c5nj02330k1.pdf [file c5nj02330k1.pdf]

*ESI for*

**New sterically encumbered arylimido hexamolybdates for organic oxidation reactions**

Ritambhara Jangir, Rajendran Antony, Ramaswamy Murugavel\*

---

**Contents**

1. Figure S1. <sup>1</sup>H NMR spectrum of compound **1** in DMSO-*d*<sub>6</sub> (400 MHz).
2. Figure S2. <sup>1</sup>H NMR spectrum of compound **2** in DMSO-*d*<sub>6</sub> (400 MHz).
3. Figure S3. <sup>1</sup>H NMR spectrum of compound **3** in Acetone-*d*<sub>6</sub> (400 MHz).
4. Figure S4. TGA curves of **1-3** (10 °C/min, N<sub>2</sub> atm).
5. Figure S6. . Effect of time on selectivity and conversion % in cyclohexene oxidation catalysed by **2**.
6. Figure S7. Effect of time on selectivity and conversion % in cyclohexene oxidation catalysed by **3**.
7. Effect of time on selectivity and conversion % in benzyl alcohol oxidation catalysed by **1**.
8. Effect of time on selectivity and conversion % in benzyl alcohol oxidation catalysed by **2**.
9. Figure S9. ESI-MS spectrum of reaction mixture after benzyl alcohol oxidation catalysed by **1**.

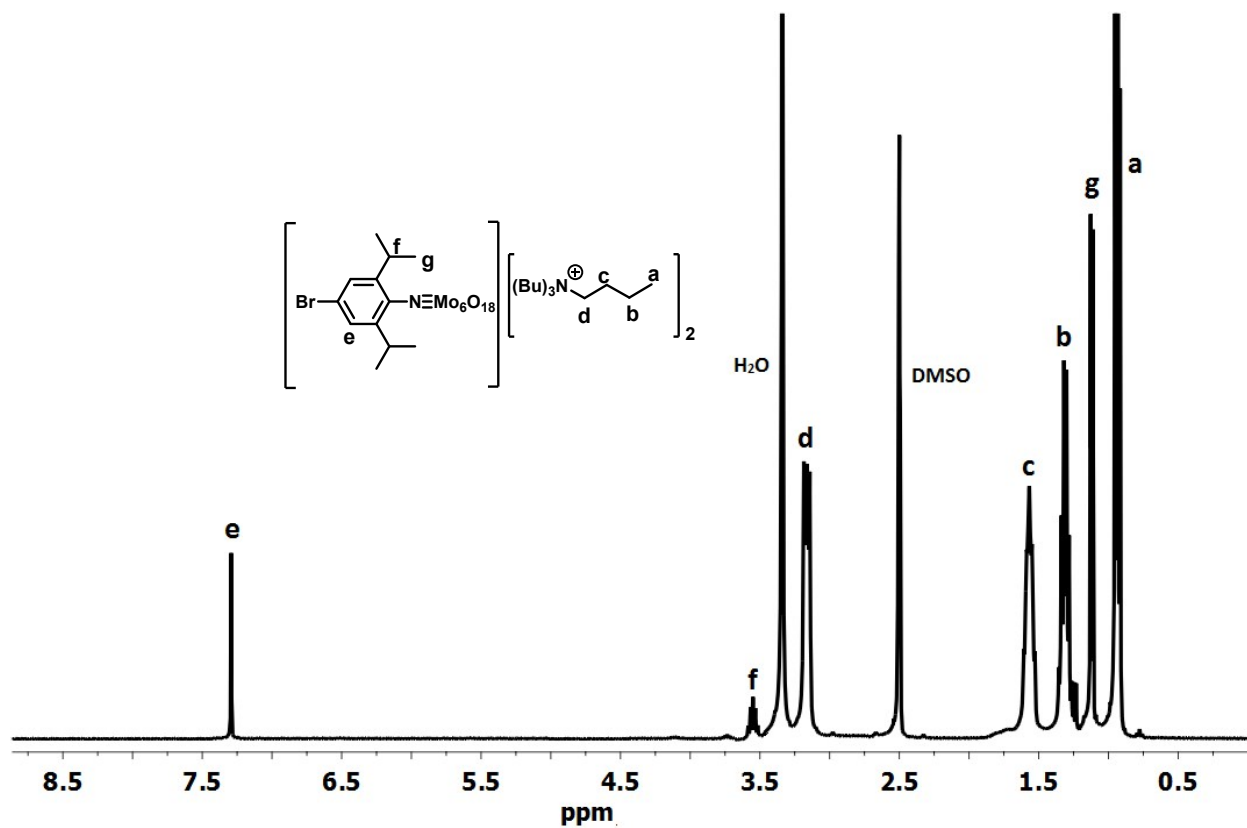

**Figure S1.**  $^1\text{H}$  NMR spectrum of compound **1** in  $\text{DMSO-}d_6$  (400 MHz).

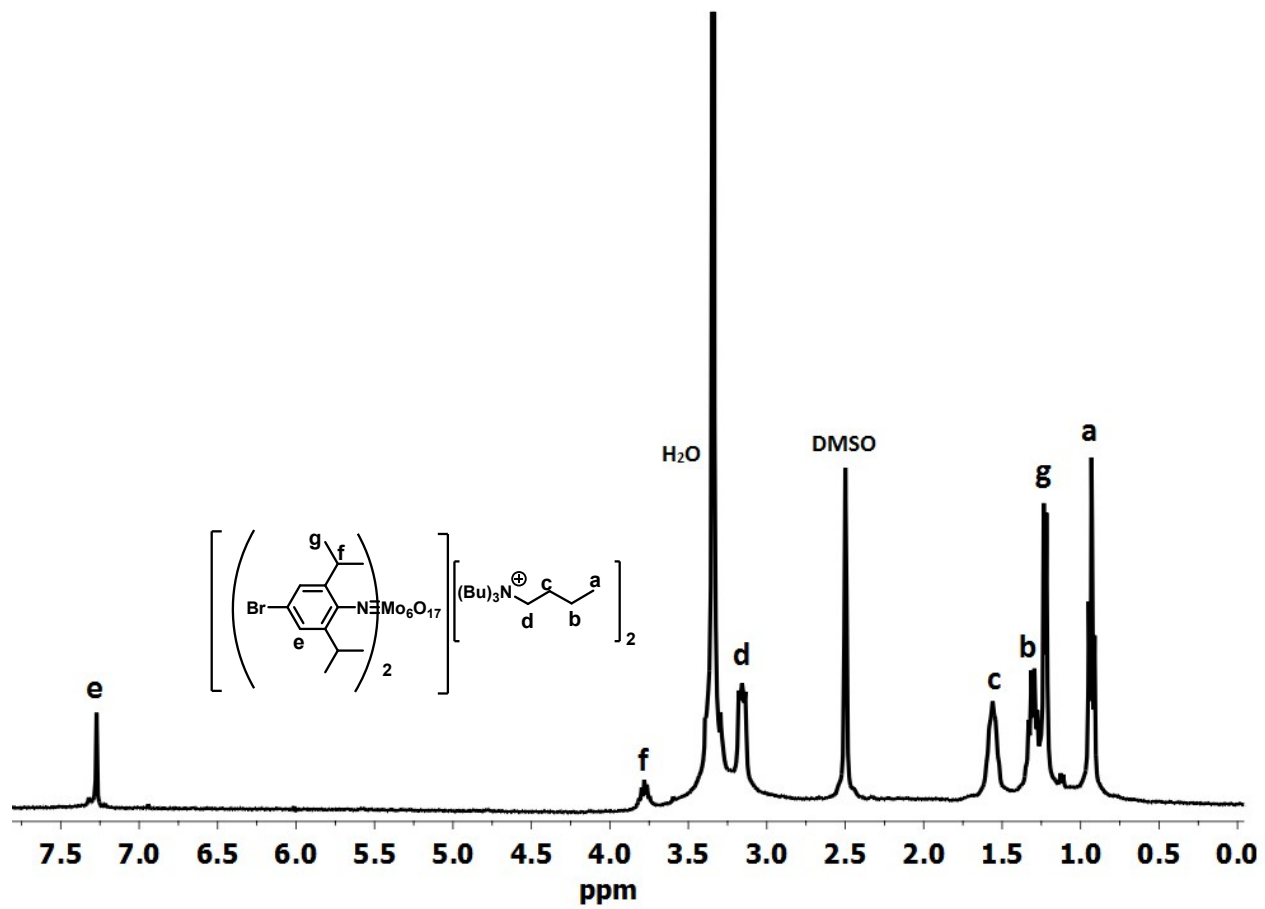

**Figure S2.** <sup>1</sup>H NMR spectrum of compound 2 in DMSO-*d*<sub>6</sub> (400 MHz).

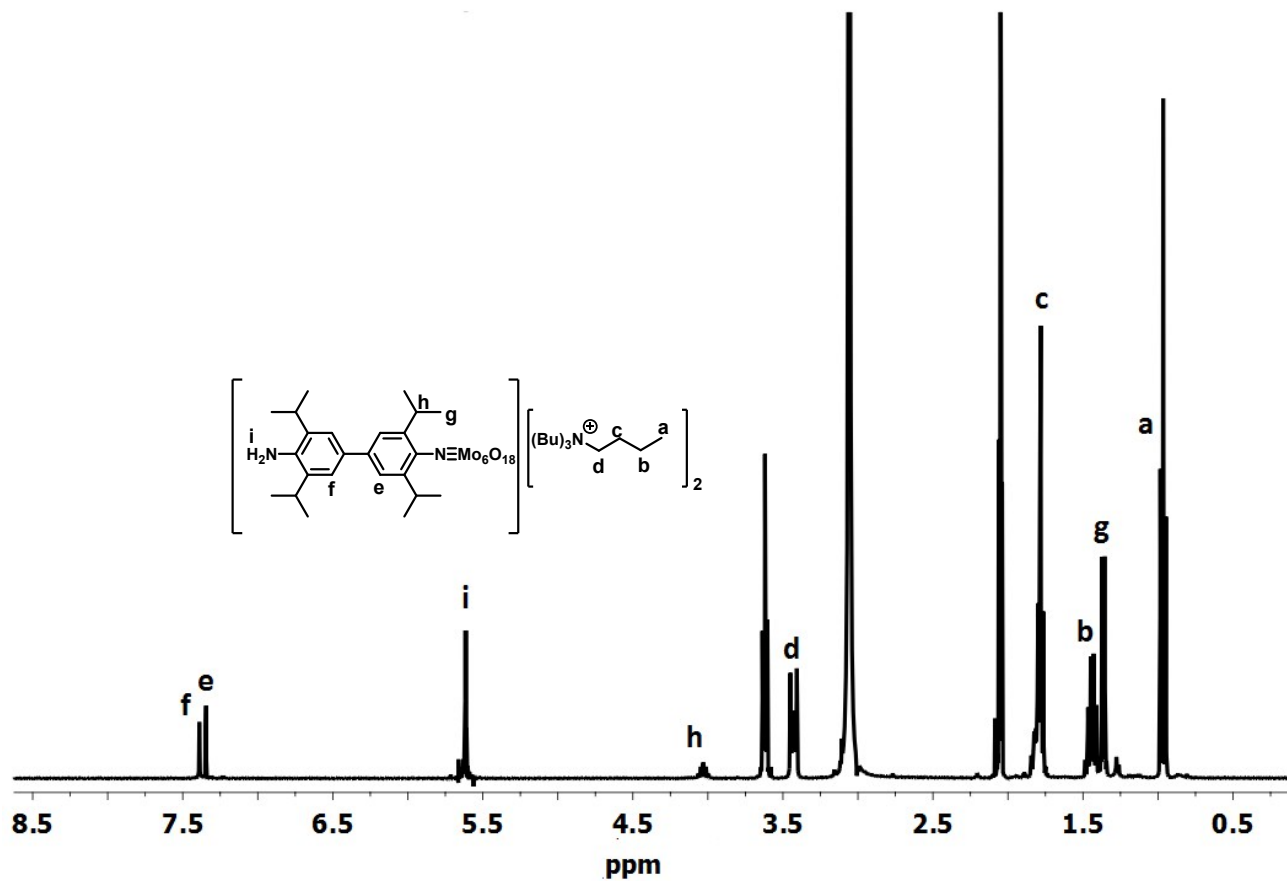

**Figure S3.**  $^1\text{H}$  NMR spectrum of compound **3** in  $\text{Acetone-}d_6$  (400 MHz).

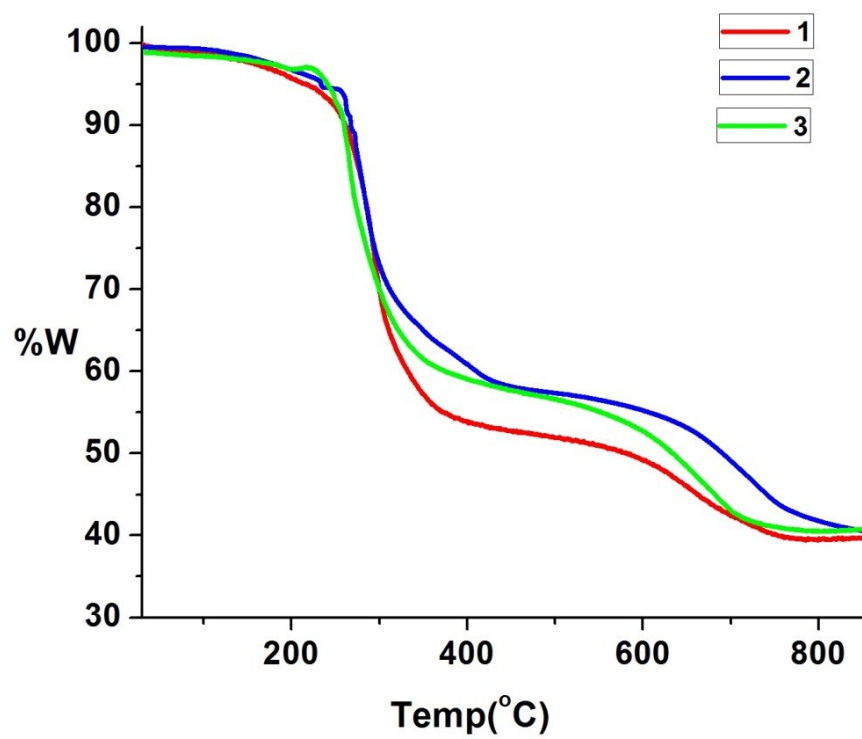

**Figure S4.** TGA cures of 1-3 (10 °C/min, N<sub>2</sub> atm).

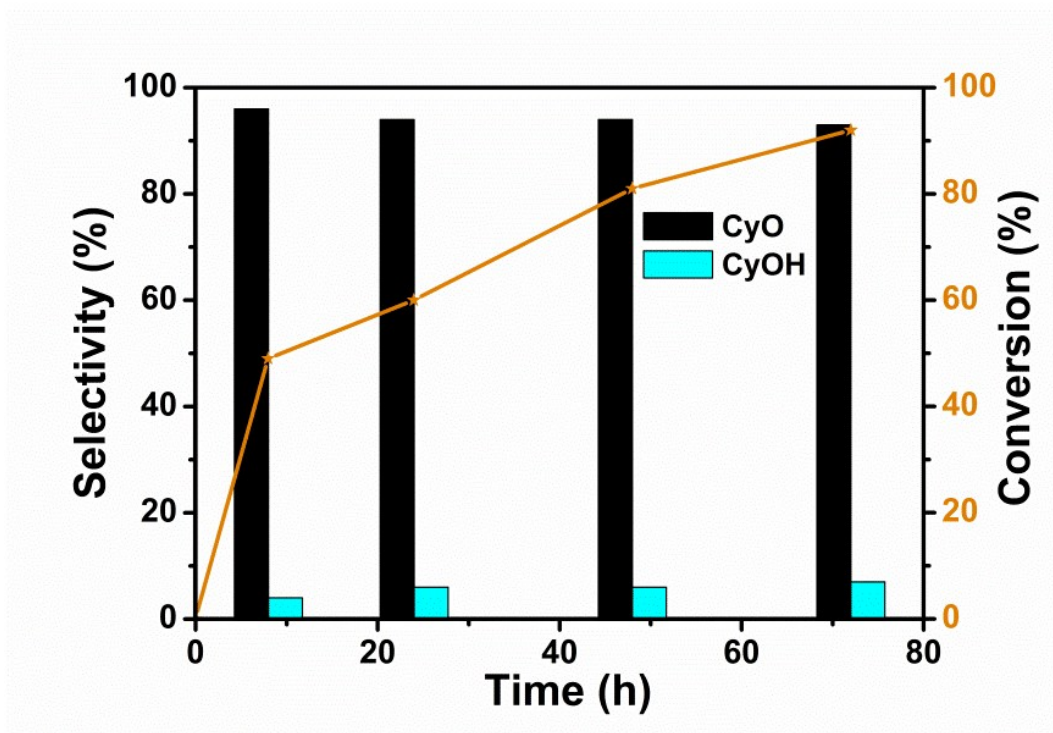

**Figure S5.** Effect of time on selectivity and conversion % in cyclohexene oxidation catalysed by 2.

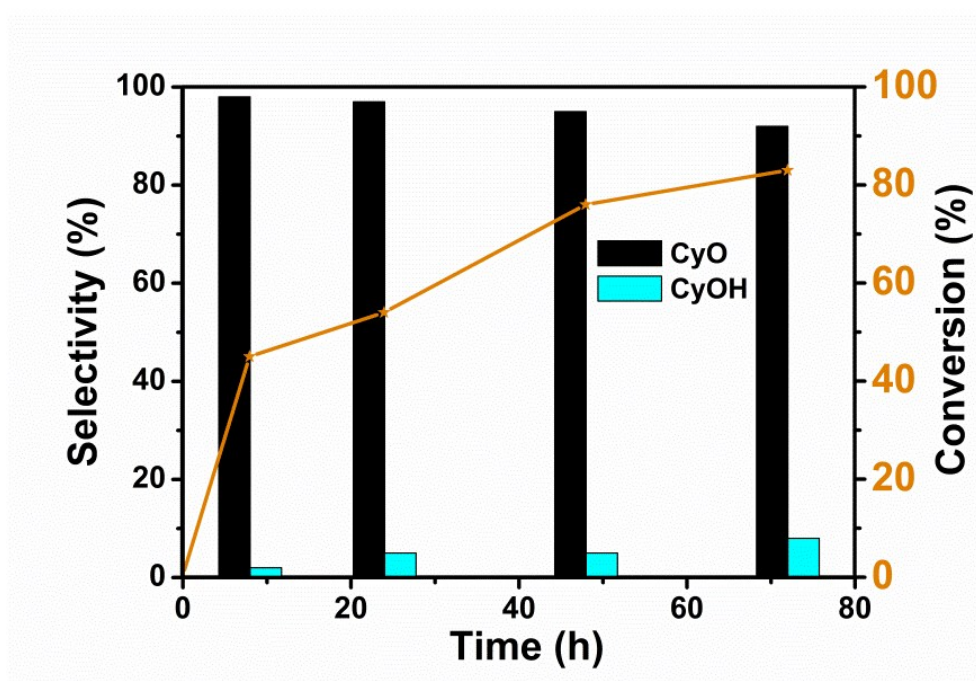

**Figure S6.** Effect of time on selectivity and conversion % in cyclohexene oxidation catalysed by 3.

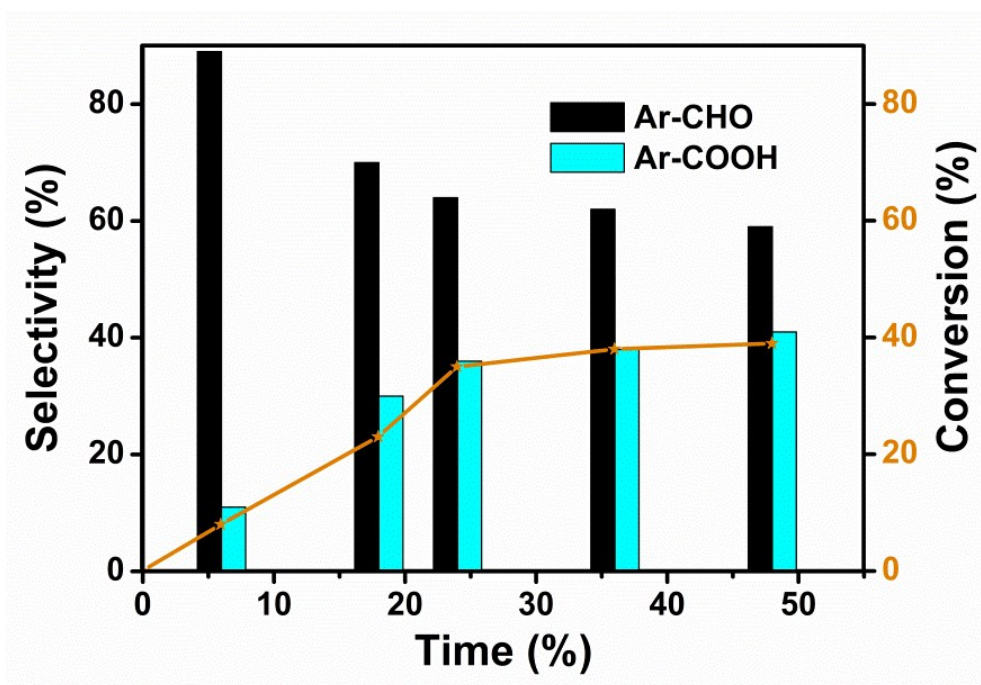

**Figure S7.** Effect of time on selectivity and conversion % in benzyl alcohol oxidation catalysed by 1.

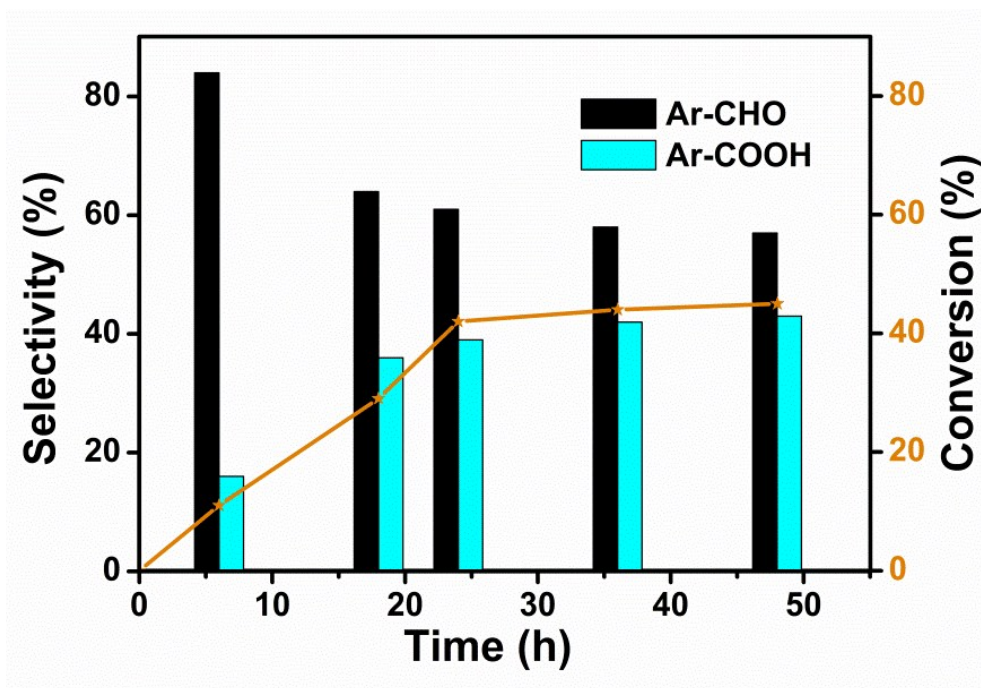

**Figure S8.** Effect of time on selectivity and conversion % in benzyl alcohol oxidation catalysed by 2.

# Display Report

## Analysis Info

Analysis Name D:\Data\AUG15\RM-RJ-072-AGAIN.d  
Method Tune\_neg\_Standard\_NAICSI-2000.m  
Sample Name RM-RJ-072-AGAIN  
Comment LRMS

Acquisition Date 11/5/2015 9:17:12 PM  
Operator SSK OUT  
Instrument maXis impact 282001.00081

## Acquisition Parameter

|             |          |                      |          |                  |           |
|-------------|----------|----------------------|----------|------------------|-----------|
| Source Type | ESI      | Ion Polarity         | Negative | Set Nebulizer    | 0.3 Bar   |
| Focus       | Active   | Set Capillary        | 3800 V   | Set Dry Heater   | 180 °C    |
| Scan Begin  | 50 m/z   | Set End Plate Offset | -500 V   | Set Dry Gas      | 4.0 l/min |
| Scan End    | 2000 m/z | Set Charging Voltage | 2000 V   | Set Divert Valve | Source    |
|             |          | Set Corona           | 0 nA     | Set APCI Heater  | 0 °C      |

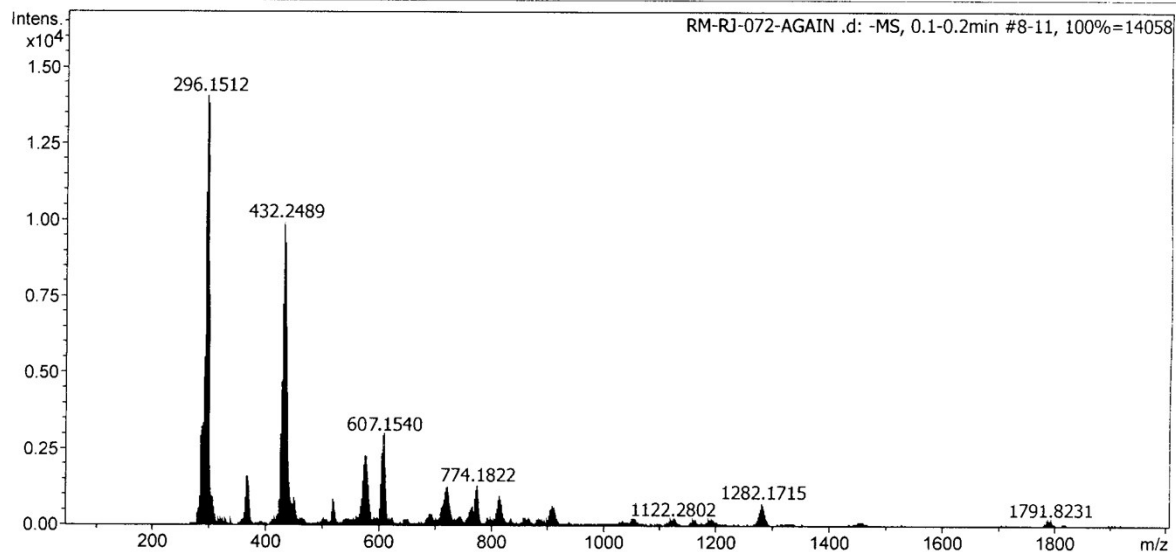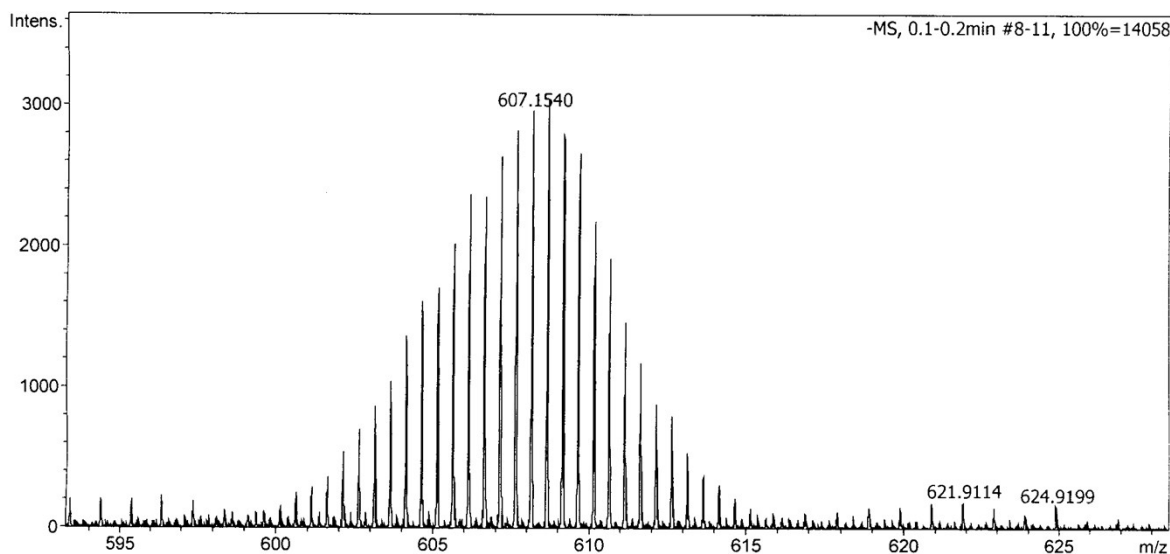

RM-RJ-072-AGAIN.d

Bruker Compass DataAnalysis 4.1

printed: 11/5/2015 11:15:40 PM

by: mr-rs-in

Page 1 of 1

**Figure S9.** ESI-MS spectrum of reaction mixture after benzyl alcohol oxidation catalysed by **1**. The peak centered at  $m/z$  607 corresponds to the molecular ion of **1**.
